# Supplementary material
Source: PubMed Central journal article supplement (PMC2258886)
Supplement: jbacter_190_6_2004__2.pdf [file jbacter_190_6_2004__2.pdf]

**Table S1. Oligonucleotide primers used in this study.**

| <b>Name</b>  | <b>Description</b>                              | <b>Sequence (5' → 3')</b>              |
|--------------|-------------------------------------------------|----------------------------------------|
| DnrNA        | Deletion of gonococcal <i>dnrN</i>              | TTTTTGAACACCATCAGGGTCGG                |
| DnrNB        | Deletion of gonococcal <i>dnrN</i>              | GGCTGAGGTGGCCAAGGAAAATATC<br>CCAAAGCCC |
| DnrNC        | Deletion of gonococcal <i>dnrN</i>              | TAAAAGGAACCGGTGGAGTCGGATA<br>TTTCAATGC |
| DnrND        | Deletion of gonococcal <i>dnrN</i>              | GCCGTAAACGGTTAGTCGGCG                  |
| KanAgeIFwd   | Amplification of Kan <sup>R</sup> cassette      | CGTAACCGGTAAAGCCAGTCCGCAG              |
| KanAgeIRev   | Amplification of Kan <sup>R</sup> cassette      | CGATACCGGTGGAGGATCATCCAGC              |
| ScdANheI     | Expression of <i>S. aureus</i> ScdA             | AGGAGGTTAGCTAGCATGATAAAT               |
| ScdAEcoRI    | Expression of <i>S. aureus</i> ScdA             | ACTGCTGGAATTCTTTTTGCCAA                |
| ScdAHindIII  | Complementation of <i>S. aureus</i> <i>scdA</i> | GAAGTGCAAAGCTTACTTAGCAA                |
| ScdAmutEco   | Deletion of <i>S. aureus</i> <i>scdA</i>        | TTGGCGAATTCCATTATGATGTC                |
| ScdAmutBam   | Deletion of <i>S. aureus</i> <i>scdA</i>        | AACAAGGATCCATCCCACACTT                 |
| aniA_RT_539F | Detection of <i>aniA</i> transcript in qRT-PCR  | TCGGTATGCACATCGCCAA                    |
| aniA_RT_705R | Detection of <i>aniA</i> transcript in qRT-PCR  | GGCAACGGCTTTGTCCATATC                  |
| dnrN_RT_33F  | Detection of <i>dnrN</i> transcript in qRT-PCR  | CTTTGGCGCAACCGTTGAT                    |
| dnrN_RT_160R | Detection of <i>dnrN</i> transcript in qRT-PCR  | CAATTTCCGCCGAAAGGT                     |
| norB_RT_133F | Detection of <i>norB</i> transcript in qRT-PCR  | TCCGCCTGGTTGGATTTGA                    |
| norB_RT_251R | Detection of <i>norB</i> transcript in qRT-PCR  | CGGCTTTGATTGCGGTATTCA                  |
| polA_RT_441F | Detection of <i>polA</i> transcript in qRT-PCR  | CGTTACGCTGGTGAACACGAT                  |
| polA_RT_546R | Detection of <i>polA</i> transcript in qRT-PCR  | GATCAGCGCGAGATAATCACG                  |
